# Supplementary material for: Identifying differentially expressed proteins in sorghum cell cultures exposed to osmotic stress
Source: PubMed Central journal article supplement (PMC5989219; doi:10.1038/s41598-018-27003-1), 2018-06-06
Supplement: 41598_2018_27003_MOESM1_ESM.pdf [file 41598_2018_27003_MOESM1_ESM.pdf]

**Title: Identifying differentially expressed proteins in sorghum cell cultures exposed to osmotic stress**

**Authors:** Rudo Ngara, Elelwani Ramulifho, Mahsa Movahedi, Nemera G. Shargie, Adrian P. Brown, & Stephen Chivasa

**Supplementary Table S1.** Primer sequences of sorghum target genes used in quantitative real time PCR analysis

| Target gene <sup>a</sup> | Forward primer                  | Reverse primer             |
|--------------------------|---------------------------------|----------------------------|
| SORBI_3004G162400        | 5'-AGGGACGACAGAGCATAGG-3'       | 5'-TGGCCAGCATCTGAGTCTTC-3' |
| SORBI_3006G065100        | 5'-GTGCATTGCGTCGACAACTC-3'      | 5'-CCTCCTGGCTAGGCTCATTG-3' |
| SORBI_3009G101400        | 5'-TCCTGAGGGGTCAAACGAC-3'       | 5'-TTGTCAGGCCCTCCTTTTCC-3' |
| SORBI_3003G058200        | 5'-TTGTCAGGAAGAAGAGGATGAGGAG-3' | 5'-TTTCTTGAACCCTTGGCCG-3'  |
| SORBI_3001G342600        | 5'-AAAGGCCAGCTGATGATCC-3'       | 5'-CGTCATGCAGCTCATGCTTC-3' |
| Sb0246s002010            | 5'-ATAGCTCTCTGGCTCCTGACG-3'     | 5'-CGCTTCTCGCTGTCGATGG-3'  |
| SORBI_3002G057900        | 5'-ATGAGGCCACCAACGCAATC-3'      | 5'-ACGCGATCACGACTCCCTC-3'  |
| SORBI_3004G142800        | 5'-ACATACATCGGAGGCGTGTC-3'      | 5'-TATGGCTTGTCTTCAGGCG-3'  |
| SORBI_3002G315800        | 5'-CTTTTGGTGCTGTGGAGTGC-3'      | 5'-CCATCGCCGCACATAAAACC-3' |
| SORBI_3009G190800        | 5'-TGGTCCCACGGGATAAATTCG-3'     | 5'-CTTGAGAAGCTGAGGAGCGG-3' |
| SORBI_3005G132400        | 5'-GACAAGCCTATCGGCAAACC-3'      | 5'-TTCTCGTCAGCAGCAGAACC-3' |
| SORBI_3002G039000        | 5'-TCATCAGCAGACGTTACCAGG-3'     | 5'-CAATGCTGAACCCGAACGAG-3' |
| SORBI_3002G417800        | 5'-GGTCCCCTGTCTGGAAATCG-3'      | 5'-GATCCATCAAGGCCTACCGC-3' |
| SORBI_3007G172100        | 5'-GGATCAACGCGATCAAGACG-3'      | 5'-GCTTGGCGATGTACTGGAAC-3' |
| SORBI_3002G302000        | 5'-TCTCCACTCGCATCAAGCTC-3'      | 5'-TCGATCTCGTCGTGGAAACC-3' |
| SORBI_3006G242000        | 5'-TCACCAACGAAGAGTACCGC-3'      | 5'-CAGGTCCTCGTTATCGTCGG-3' |
| Sb03g038910*             | 5'-TCCTGAAGCATCTTCCCTCC-3'      | 5'-ACAGCCTGATTAGTTGGGGG-3' |

<sup>a</sup>Target gene locus identity obtained from the Uniprot database.

\*Reference control gene, whose expression does not change in response to drought stress<sup>27</sup>.
